# Supplementary material for: Quantifying local-scale dust emission from the Arabian Red Sea coastal plain
Source: Copernicus journal article supplement (doi:10.5194/acp-17-993-2017), 2017-01-23
Supplement: Supplementary file 1 [file acp-17-993-2017-supplement.pdf]

Supplement of Atmos. Chem. Phys., 17, 993–1015, 2017  
<http://www.atmos-chem-phys.net/17/993/2017/>  
doi:10.5194/acp-17-993-2017-supplement  
© Author(s) 2017. CC Attribution 3.0 License.

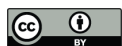

*Supplement of*

## **Quantifying local-scale dust emission from the Arabian Red Sea coastal plain**

**Anatolii Anisimov et al.**

*Correspondence to:* Georgiy Stenchikov ([georgiy.stenchikov@kaust.edu.sa](mailto:georgiy.stenchikov@kaust.edu.sa))

The copyright of individual parts of the supplement might differ from the CC-BY 3.0 licence.

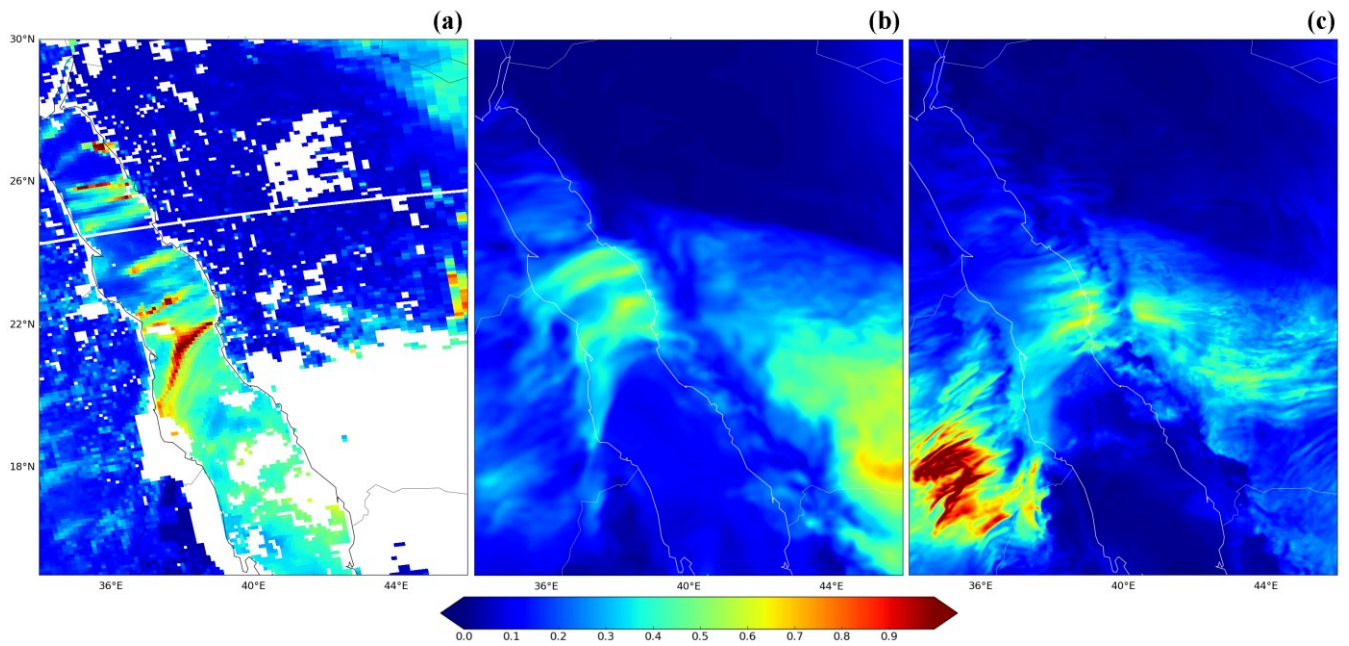

**Figure S1. Aerosol optical depth (AOD) from (a) MODIS AQUA satellite (MYD04\_L2 collection 6 combined Dark Target (ocean and dark land) and Deep Blue (bright land) product) at 10.55 UTC on 14 January 2009; (b) Kalenderski et al. (2013) WRF-Chem simulation at 11.00 UTC on 14 January 2009; (c) current study WRF-Chem simulation at 11.00 UTC on 14 January 2009.**

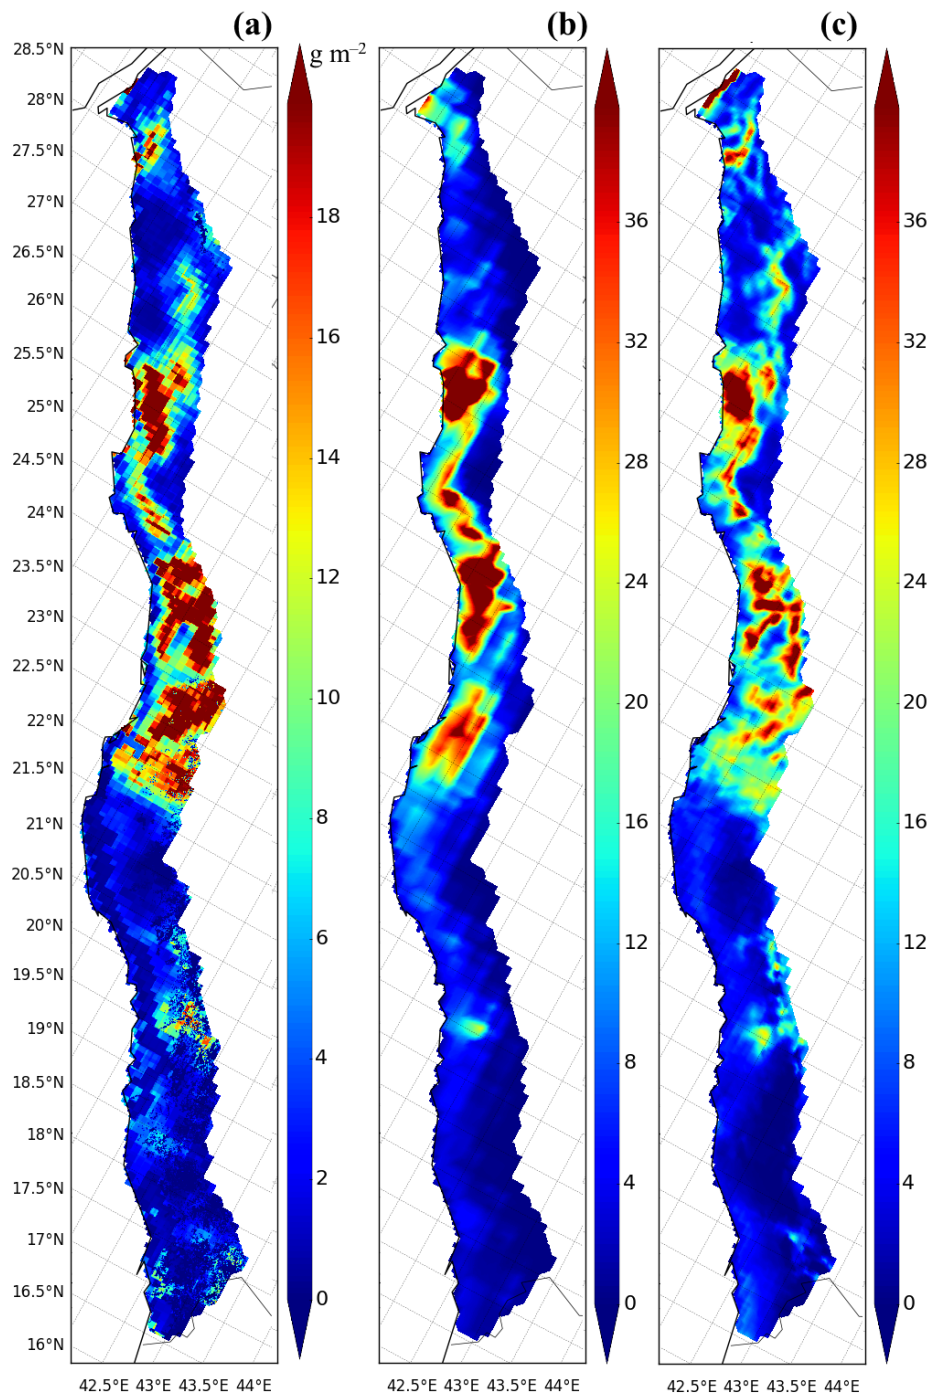

**Figure S2.** Dust emission ( $\text{g m}^{-2}$ ) in (a) 1kmALL experiment with SEVIRI source function during 1–31 January 2009; (b) Kalenderski et al. (2013) WRF-Chem simulation during 1–20 January 2009; (c) current study WRF-Chem simulation during 1–31 January 2009.
